# Supplementary material
Source: Research Square preprint supplement (doi:10.21203/rs.3.rs-8772505/v1)
Supplement: Supplementary file 1 [file f4a088a36ac08279824b73f8.docx]

**Appendix 6: Data collection instrument and field note recording sheet**

**INTERVIEW GUIDE: FOR MANAGERS**

**TITTLE: DEVELOPING A USER CENTRIC GUIDE TO FACILITATE SMOOTH TRANSITION OF COMMUNITY SERVICE NURSE PRACTITIONERS FROM STUDENT TO PROFESSIONAL NURSE IN KWAZULU-NATAL.**

**__________________________________________________________________**

To be completed by the researcher

| District code | Hospital code | Participant code |
| --- | --- | --- |
|  |  |  |

**Date: ………………………………. Time: ……………………..**

**SECTION A: INTRODUCTION AND ORIENTATION**

- Greetings Introduction
- Confirmation of informed consent and assure confidentiality
- Create rapport
- Orientation about the interview session
- Permission to record session and gather some field notes
- Start recoding by pronouncing the participant code

**SECTION B: INTERVIEW QUESTIONS**

**QUESTION 1: What are your perspectives as a manager regarding preparedness of CSNPs for their role during CSP?**

Relevant notes on participant response: -------------------------------------------------------------------------------------------------------------------------------------------------------------------------------------------------------------------------------------------------------------------------------------------------------------------------------------------------------------------------------------------------------------------------------------------------------------------------------------------------------

**Probing Questions:**

**Why do you think the ONMs are having such perspectives?**

Relevant notes on Participant response:-------------------------------------------------------------------------------------------------------------------------------------------------------------------------------------------------------------------------------------------------------------------------------------------------------------------------------------------------------------------------------------------------------------------------------------------------------------------------------------------------------------------------------------------------------------------------------------------------------------------------------------------------------------------------------------------------------------------------------------------------------------------------------------

**QUESTION 2:** **What are the factors that could facilitate positive work experiences of CSNPs during the CSP?**

Relevant notes on Participant response: ------------------------------------------------------------------------------------------------------------------------------------------------------------------------------------------------------------------------------------------------------------------------------------------------------------------------------------------------------------------------------------------------------------------------------------------------------------------------------------------------------

**Probing Questions:**

**Which of these factors were /are evident during CSP?**

Relevant notes on Participant response:-------------------------------------------------------------------------------------------------------------------------------------------------------------------------------------------------------------------------------------------------------------------------------------------------------------------------------------------------------------------------------------------------------------------------------------------------------------------------------------------------------------------------------------------------------------------------------------------------------------------------------------------------------------------------------------------------------------------------------------------------------------------------------------

**QUESTION 3: In your opinion what strategies could facilitate positive experience and support of CSNPs?**

Relevant notes on Participant response: ------------------------------------------------------------------------------------------------------------------------------------------------------------------------------------------------------------------------------------------------------------------------------------------------------------------------------------------------------------------------------------------------------------------------------------------------------------------------------------------------------

**Probing Questions:**

**In your opinion what support do you think is required to facilitate smooth transition of the recently qualified nurses into a PN?**

Relevant notes on Participant response:----------------------------------------------------------------------------------------------------------------------------------------------------------------------------------------------------------------------------------------------------------------------------------------------------------------------------------------------------------------------------------------------------------------------------------------------------------------------------------------------------------------------------------------------------------------------------------------------------------------------------------------------------------------------------------------------------------------------------------------------------------------------------------------------------------------------------------------------------------------------------___________________________________________________________________

**SECTION C: CONCLUDING THE INTERVIEW SESSION**

1. **Member checking:**

- If participant agrees – the researcher and the participant listen to the recorded information
- The researcher summarises the information gathered and confirms with participant that the information is correct

1. **Closing the interview session:**

- The researcher thanks the participant for participation and bid her good by

**Appendix 7: Data collection instrument and field note recording sheet**

**INTERVIEW GUIDE: FOR CSNPs AND PROFESSIONAL NURSES**

**TITTLE: DEVELOPING A USER CENTRIC GUIDE TO FACILITATE SMOOTH TRANSITION OF COMMUNITY SERVICE NURSE PRACTITIONERS FROM STUDENT TO PROFESSIONAL NURSE IN KWAZULU-NATAL.**

**__________________________________________________________________**

To be completed by the researcher

| District code | Hospital code | Participant code |
| --- | --- | --- |
|  |  |  |

**Category: Current CSNP: Professional Nurse:**

**Date: ………………………………. Time: ……………………..**

**SECTION A: INTRODUCTION AND ORIENTATION**

- Greetings Introduction
- Confirmation of informed consent and assure confidentiality
- Create rapport
- Orientation about the interview session
- Permission to record session and gather some field notes
- Start recoding by pronouncing the participant code

**SECTION B: INTERVIEW QUESTIONS**

**QUESTION 1: What have been your experience during CSP as a CSNP?**

Relevant notes on participant response: -------------------------------------------------------------------------------------------------------------------------------------------------------------------------------------------------------------------------------------------------------------------------------------------------------------------------------------------------------------------------------------------------------------------------------------------------------------------------------------------------------

**Probing Questions:**

**What has contributed to the experience that you have had?**

Relevant notes on Participant response:-------------------------------------------------------------------------------------------------------------------------------------------------------------------------------------------------------------------------------------------------------------------------------------------------------------------------------------------------------------------------------------------------------------------------------------------------------------------------------------------------------------------------------------------------------------------------------------------------------------------------------------------------------------------------------------------------------------------------------------------------------------------------------------

**QUESTION 2:** **What are the factors that could facilitate positive work experiences of CSNPs. during the CSP?**

Relevant notes on Participant response: ------------------------------------------------------------------------------------------------------------------------------------------------------------------------------------------------------------------------------------------------------------------------------------------------------------------------------------------------------------------------------------------------------------------------------------------------------------------------------------------------------

**Probing Questions:**

**Which of these factors were /are evident during your CSP?**

Relevant notes on Participant response:-------------------------------------------------------------------------------------------------------------------------------------------------------------------------------------------------------------------------------------------------------------------------------------------------------------------------------------------------------------------------------------------------------------------------------------------------------------------------------------------------------------------------------------------------------------------------------------------------------------------------------------------------------------------------------------------------------------------------------------------------------------------------------------

**QUESTION 3: In your opinion what strategies could facilitate positive experience and support of CSNPs?**

Relevant notes on Participant response: ------------------------------------------------------------------------------------------------------------------------------------------------------------------------------------------------------------------------------------------------------------------------------------------------------------------------------------------------------------------------------------------------------------------------------------------------------------------------------------------------------

**Probing Questions:**

**In your opinion what support do you think is required to facilitate smooth transition of the recently qualified nurses into a PN?**

Relevant notes on Participant response:----------------------------------------------------------------------------------------------------------------------------------------------------------------------------------------------------------------------------------------------------------------------------------------------------------------------------------------------------------------------------------------------------------------------------------------------------------------------------------------------------------------------------------------------------------------------------------------------------------------------------------------------------------------------------------------------------------------------------------------------------------------------------------------------------------------------------------------------------------------------------___________________________________________________________________

**SECTION C: CONCLUDING THE INTERVIEW SESSION**

1. **Member checking:**

- If participant agrees – the researcher and the participant listen to the recorded information
- The researcher summarises the information gathered and confirms with participant that the information is correct

1. **Closing the interview session:**

- The researcher thanks the participant for participation and bid her good bye.
